# Supplementary material for: Volcanic SO 2 and SiF 4 visualization using 2-D thermal emission spectroscopy – Part 1: Slant-columns and their ratios
Source: Copernicus journal article supplement (doi:10.5194/amt-5-275-2012), 2012-02-02
Supplement: Supplementary file 2 [file amt-5-275-2012-supplement.zip]

Archive with 3 entries (3 files):
- SO2_SIF4_molec.mpg
- SO2_volcanic_plume.mpg
- Supplement.pdf
